# Supplementary material
Source: Springer Nature journal article supplement (https://www.springermedizin.de/resource/supplementary/13063_2013_1926_MOESM2_ESM.pdf/9621604)
Supplement: MOESM2 [file 9621604]

|                         | Round 1 | Round 2 | Round 3 |
|-------------------------|---------|---------|---------|
| Number of CTU Directors | 25      | 32      | 24      |
| 12                      | ■       | ■       | ■       |
| 7                       | ■       | ■       | X       |
| 6                       | X       | ■       | ■       |
| 3                       | ■       | X       | ■       |
| 3                       | ■       | X       | X       |
| 7                       | X       | ■       | X       |
| 3                       | X       | X       | ■       |
| 7                       | X       | X       | X       |

X : NO RESPONSE

■ : RESPONSE RECEIVED
